# Supplementary material for: Reactive stroma as a prognostic biomarker of metastasis in patients with breast cancer: integration of histopathology and transcriptomic profiling
Source: Research Square preprint supplement (doi:10.21203/rs.3.rs-6814730/v1), 2025-06-29
Supplement: Supplementary file 1 [file 4e5c3acfe9d27acb92f653b3.docx]

**Supplementary Table 1.** Univariate Cox proportional hazards regression analysis for overall survival (OS) and metastasis-free survival (MFS) based on clinicopathological variables and total stromal content in breast cancer patients. Hazard ratios (HR), 95% confidence intervals (CI), and p-values are reported.

|  |  |
| --- | --- |
|  |  | **Overall Survival** | | **Metastasis-Free Survival** | |
| **Variables** |  | **HR (95% CI)** | ***p-value*** | **HR (95% CI)** | ***p-value*** |
| **Age** |  |  |  |  |  |
|  | <55 years | Reference value |  | Reference value |  |
|  | 55-65 years | 1.75 (0.92-3.31) | 0.087 | 1.68 (0.89-3.19) | 0.110 |
|  | >65 years | 4.61 (2.43-8.74) | <0.001 | 3.93 (1.75-8.86) | 0.001 |
| **Menopausal Status** |  |  |  |  |  |
|  | Premenopausal | Reference value |  | Reference value |  |
|  | Postmenopausal | 0.94 (0.35-2.54) | 0.902 | 0.78 (0.19-3.26) | 0.730 |
| **ER Status** |  |  |  |  |  |
|  | Positive | Reference value |  | Reference value |  |
|  | Negative | 2.78 (1.64-4.71) | <0.001 | 2.54 (1.42-4.52) | 0.002 |
| **PR Status** |  |  |  |  |  |
|  | Positive | Reference value |  | Reference value |  |
|  | Negative | 2.11 (1.23-3.61) | 0.007 | 2.51 (1.39-4.54) | 0.002 |
| **HER2 Status** |  |  |  |  |  |
|  | Positive | 1.41 (0.8-2.5) | 0.231 | 2.25 (1.23-4.09) | 0.008 |
|  | Negative | Reference value |  | Reference value |  |
| **Histological grade** |  |  |  |  |  |
|  | Well differentiated | Reference value |  | Reference value |  |
|  | Moderately Differentiated | 1.79 (0.51-6.36) | 0.366 | 1.45 (0.52-4.07) | 0.480 |
|  | Poorly differentiated | 3.5 (1.04-11.74) | 0.043 | 2.19 (0.8-5.98) | 0.126 |
| **Tumor size** |  |  |  |  |  |
|  | pT0 | Reference value |  | Reference value |  |
|  | pT1 | 0.11 (0.02-0.63) | 0.014 | 0.15 (0.04-0.52) | 0.003 |
|  | pT2 | 0.58 (0.14-2.45) | 0.461 | 0.43 (0.13-1.41) | 0.163 |
|  | pT3 | 0.57 (0.06-5.5) | 0.625 | 0.34 (0.04-2.93) | 0.327 |
|  | pT4 | 7.69 (1.47-40.35) | 0.016 |  |  |
| **Nodal Status** |  |  |  |  |  |
|  | Positive | 2.28 (0.74-7.09) | 0.153 | 1.67 (0.64-4.4) | 0.297 |
|  | Negative | Reference value |  | Reference value |  |
| **Total Stroma** |  |  |  |  |  |
|  | High | Reference value |  | Reference value |  |
|  | Low | 3.49 (1.84-6.62) | <0.001 | 4.11 (1.62-10.4) | <0.001 |

**Supplementary Table 2.** Multivariate Cox regression analysis for overall survival (OS) and metastasis-free survival (MFS) based on total stromal content. Models were adjusted for age, pT, pN, molecular subtype, and histological grade. Hazard ratios (HR) and 95% confidence intervals (CI) are presented. Reference values are indicated where applicable.

|  |  | **Overall Survival** | | **Metastasis-Free Survival** | |
| --- | --- | --- | --- | --- | --- |
| **Variables** |  | **HR (95% CI)** | **P-value** | **HR (95% CI)** | **P-value** |
| **Age** |  |  |  |  |  |
|  | <55 years | Reference value |  | Reference value |  |
|  | 55-65 years | 1.46 (0.39-5.42) | 0.576 | 0.88 (0.3-2.6) | 0.815 |
|  | >65 years | 2.2 (0.37-13.05) | 0.385 | 1.59 (0.3-8.26) | 0.584 |
| **ER Status** |  |  |  |  |  |
|  | Positive | Reference value |  | Reference value |  |
|  | Negative | 3.07 (0.32-28.96) | 0.328 | 1.57 (0.29-8.49) | 0.598 |
| **PR Status** |  |  |  |  |  |
|  | Positive | Reference value |  | Reference value |  |
|  | Negative | 1.17 (0.12-11.56) | 0.895 | 1.48 (0.29-7.47) | 0.637 |
| **Tumor size** |  |  |  |  |  |
|  | pT0 | Reference value |  | Reference value |  |
|  | pT1 | 0.25 (0.04-1.78) | 0.167 | 0.24 (0.06-0.98) | 0.047 |
|  | pT2 | 1.07 (0.21-5.41) | 0.938 | 0.64 (0.17-2.46) | 0.517 |
|  | pT3 | 1.25 (0.12-12.76) | 0.850 | 0.51 (0.05-4.96) | 0.558 |
|  | pT4 | 5.52 (0.76-40.27) | 0.092 |  |  |
| **Total Stroma** |  |  |  |  |  |
|  | High | Reference value |  | Reference value |  |
|  | Low | 2.49 (0.6-10.35) | 0.209 | 4.08 (0.88-18.94) | 0.073 |

**Supplementary Table 3.** Univariate Cox proportional hazards regression analysis for overall survival (OS) and metastasis-free survival (MFS) based on clinicopathological variables and reactive stromal content in breast cancer patients. Hazard ratios (HR), 95% confidence intervals (CI), and p-values are reported.

|  |  | **Overall Survival** | | **Metastasis-Free Survival** | |
| --- | --- | --- | --- | --- | --- |
| **Variables** |  | **HR (95% CI)** | **p-value** | **HR (95% CI)** | **p-value** |
| **Age** |  |  |  |  |  |
|  | <55 years | Reference value |  | Reference value |  |
|  | 55-65 years | 2.30 (1.06-4.98) | 0.034 | 1.23 (0.61-2.45) | 0.565 |
|  | >65 years | 3.84 (1.53-9.64) | 0.004 | 3.17 (1.26-7.96) | 0.014 |
| **Menopausal Status** |  |  |  |  |  |
|  | Premenopausal | Reference value |  | Reference value |  |
|  | Postmenopausal | 1.12 (0.29-4.34) | 0.868 | 0.35 (0.08-1.59) | 0.174 |
| **ER Status** |  |  |  |  |  |
|  | Positive | Reference value |  | Reference value |  |
|  | Negative | 2.87 (1.44-5.72) | 0.003 | 1.82 (0.97-3.43) | 0.061 |
| **PR Status** |  |  |  |  |  |
|  | Positive | Reference value |  | Reference value |  |
|  | Negative | 2.65 (1.31-5.39) | 0.007 | 2.42 (1.28-4.57) | 0.006 |
| **HER2 Status** |  |  |  |  |  |
|  | Positive | 1.75 (0.85-3.61) | 0.131 | 2.52 (1.3-4.87) | 0.006 |
|  | Negative | Reference value |  | Reference value |  |
| **Histological grade** |  |  |  |  |  |
|  | Well differentiated | Reference value |  | Reference value |  |
|  | Moderately Differentiated | 1.27 (0.33-4.92) | 0.728 | 1.46 (0.5-4.28) | 0.489 |
|  | Poorly differentiated | 2.34 (0.65-8.4) | 0.192 | 2.31 (0.82-6.49) | 0.113 |
| **Tumor size** |  |  |  |  |  |
|  | pT0 | Reference value |  | Reference value |  |
|  | pT1 | 0.11 (0.02-0.65) | 0.015 | 0.16 (0.05-0.56) | 0.004 |
|  | pT2 | 0.53 (0.12-2.38) | 0.405 | 0.47 (0.13-1.77) | 0.267 |
|  | pT3 | 0.57 (0.06-5.49) | 0.624 | 0.41 (0.05-3.56) | 0.422 |
|  | pT4 | 8.44 (1.33-53.79) | 0.024 |  |  |
| **Nodal Status** |  |  |  |  |  |
|  | Positive | 2.66 (0.81-8.73) | 0.106 | 1.38 (0.49-3.88) | 0.541 |
|  | Negative | Reference value |  | Reference value |  |
| **Reactive Stroma** |  |  |  |  |  |
|  | High | 2.51 (0.97-6.49) | 0.058 | 3.75 (1.98-7.09) | <0.01 |
|  | Low | Reference value |  | Reference value |  |

**Supplementary Figure 1. Suppression of adaptive immune processes in tumors with high reactive stromal content**. (A–D) Gene Set Enrichment Analysis (GSEA) plots showing significant negative enrichment of adaptive immune processes in tumors with high reactive stromal content. Negative enrichment was observed for T cell receptor signaling pathway (A; NES = –1.85), positive regulation of T cell activation (B; NES = –2.02), positive regulation of leukocyte cell-cell adhesion (C; NES = –2.08), and positive regulation of T cell proliferation (D; NES = –1.95), suggesting a potential suppression of T cell–mediated immune responses in this patient group.
